# Supplementary material for: Control of Competence for DNA Transformation in Streptococcus suis by Genetically Transferable Pherotypes
Source: PubMed Central journal article supplement (PMC4072589; doi:10.1371/journal.pone.0099394), 2014-06-26
Supplement: pone.0099394.s003.pdf [file pone.0099394.s003.pdf]

| Putative Function                                            | Gene in <i>S. suis</i> | <i>S. pneumoniae</i> | <i>S. pyogenes</i> | <i>S. mutans</i> | <i>S. thermophilus</i> | <i>L. lactis</i> | <i>L. plantarum</i>    | <i>B. subtilis</i> |
|--------------------------------------------------------------|------------------------|----------------------|--------------------|------------------|------------------------|------------------|------------------------|--------------------|
| <b>Transcriptional control</b>                               |                        |                      |                    |                  |                        |                  |                        |                    |
| First transcriptional regulator                              | <i>comR</i> (SSU0049)  | 37.46%               | 35.93%             | 43.81%           | 34.43%                 | -                | -                      | -                  |
| Master regulator                                             | <i>comX</i> (SSU0016)  | 46.36%               | 40.00%             | 43.23%           | 40.52%                 | 32.71%           | 30.86%( <i>sigH</i> )* | <i>comK</i> *      |
| <b>DNA uptake-recombination machinery</b>                    |                        |                      |                    |                  |                        |                  |                        |                    |
| Helicase required for DNA uptake                             | <i>comFA</i> (SSU0393) | 66.36%               | 50.00%             | 57.87%           | 52.79%                 | 51.20%           | 38.95%                 | 37.35%             |
| Membrane DNA-binding receptor                                | <i>comEA</i> (SSU0394) | 47.95%               | 47.59%             | 53.41%           | 59.26%                 | 37.56%           | 46.34%                 | 37.56%             |
| Competence protein                                           | <i>coiA</i> (SSU1083)  | 51.60%               | 45.19%             | 50.48%           | 46.01%                 | 42.50%           | 39.11%                 | 31.91%             |
| Component of the DNA transport                               | <i>comGC</i> (SSU0128) | 70.37%               | 55.68%             | 60.23%           | 60.23%                 | 56.82%           | 43.37%                 | 49.33%             |
| Competence associated endonuclease                           | <i>endA</i> (SSU1009)  | 69.49%               | 65.47%             | 65.38%           | 61.56%                 |                  | 35.29%                 |                    |
| DNA transporter                                              | <i>comFC</i> (SSU0394) | 49.08%               | 40.64%             | 50.91%           | 44.09%                 | 45.25%           | 35.24%                 | 31.28%             |
| <b>Signalling function</b>                                   |                        |                      |                    |                  |                        |                  |                        |                    |
| Sensing and regulation                                       | -----                  | <i>ComD-E</i>        | -                  | -                | -                      | -                | -                      | <i>comA-comP</i>   |
| Peptide export                                               | -----                  | <i>ComA-B</i>        | -                  | -                | -                      | -                | -                      | <i>comQ</i>        |
| <b>Possible pheromone-processing and peptide transporter</b> |                        |                      |                    |                  |                        |                  |                        |                    |
| Pheromone-processing                                         | <i>eep</i> (SSU1754)   | 63.25%               | 64.29%             | 62.29%           | 65.00%                 | 54.00%           | 47.73%                 | 37.94%             |
| Oligopeptide binding protein                                 | <i>oppA</i> (SSU1664)  | -                    | -                  | 22.69%           | -                      | 32.26%           | -                      | 24.14%             |
|                                                              | -----                  | 66.82%               | 49.92%             | -                | AmiA1                  | 26.97%           | 28.43%                 | -                  |
| Oligopeptide transporter                                     | <i>oppB</i> (SSU1661)  |                      | 33.44%             | 35.74%           |                        | 52.66%           |                        | 39.69%             |
|                                                              | <i>oppC</i> (SSU1660)  | 32.51%               | 31.67%             | 32.16%           | 32.39%                 | 51.45%           | 32.89%                 | 33.78%             |
|                                                              | <i>oppD</i> (SSU1663)  | 45.03%               | 46.03%             | 47.63%           | 44.27%                 | 55.11%           | 46.84%                 | 48.28%             |
|                                                              | <i>oppF</i> (SSU1662)  | 47.73%               | 47.53%             | 47.55%           | 49.79%                 | 60.13%           | 47.91%                 | 50.78%             |

Table S1. Conservation of competence genes in streptococci, *Lactococcus lactis*, *Lactobacillus plantarum* and *Bacillus subtilis*
